# Supplementary material for: Antagonistic Roles for MITF and TFE3 in Melanoma Plasticity
Source: PubMed Central journal article supplement — bioRxiv. 2025 Feb 18:2024.07.11.603140. Originally published 2024 Jul 12. Preprint. [Version 2] doi: 10.1101/2024.07.11.603140 (PMC11257520; doi:10.1101/2024.07.11.603140), 2025-02-18

Figure S1

|       |               |     |                                                                                  |     |
|-------|---------------|-----|----------------------------------------------------------------------------------|-----|
| MITF  | ✓ Query_10001 | 1   | [ 51]MTSRILLRQQLMREQMQEQRERREQQQLQAAQFMQgrvPVSQTPAINV SVPTTLPSATQVPMEVLVKQVTHLE  | 123 |
| TFE3  | ✓ Query_10002 | 1   | [ 109]SSSRVLLRQQLMRAQAQEQRERREQAAAAPFPS---PAPASPAISV[ 6]GHTLSRPPPAQVPREVLKQVTHLE | 184 |
| TFEB  | ✓ Query_10003 | 1   | MASRIGLRMQLMREQAQEQEQRERMQQAAMHYMQqq-QQQQQQLGG[ 6]NTPVHFQSPPPVPGEVLVKQVSYLE      | 77  |
| TFEC  | ✓ Query_10004 |     | -----                                                                            |     |
| Sigma | ✓ Query_10005 |     | -----                                                                            |     |
|       | ✓ Query_10001 | 124 | NPTKYHIQQAQRQVKQYLSTTLANKHANQVLSLPCPNQPGDHVMPVPG-----SSAPNSPMAMLTLSNSCE          | 191 |
|       | ✓ Query_10002 | 185 | NPTRYHLQARRQVKQYLSTTLGPKLASQALTPP---PGPASAQPLPAPEAAHTT--GPTGSAPNSPMALLTIGSSSE    | 258 |
|       | ✓ Query_10003 | 78  | NPTSYHLQSQSHQKQVREYLSYTYGNKFAAHISPAQSGPKPPAASPGVRAGHVLSSS--AG-NSAPNSPMAMLHIGSNPE | 154 |
|       | ✓ Query_10004 | 1   | -----MTLDHQIINPTLKWSQPAVPSGGPLVQHAHTTldSDaGLTENPLTKLLAIGKEDD                     | 55  |
|       | ✓ Query_10005 |     | -----                                                                            |     |
|       | ✓ Query_10001 | 192 | KE[ 28]MDDVIDDIISLESSYNEEILGLMD---PALQMANTLPVSGNLDLYGNQGLPPPGLT--ISNSCPANLPNiKRE | 290 |
|       | ✓ Query_10002 | 259 | KE IDDDVIDEIIISLESSYNDEMLSYLPggtTGLQLPSTLPVSGNLLDVYSSQGVATPAIT--VNSSCPaelPniKRE  | 332 |
|       | ✓ Query_10003 | 155 | RE LDDVIDNIMRL----DDVLGYIN---PEMQPNTLPSSSHLVNYSDDPQVTASLVgvTSSSCPADLTQ-KRE       | 221 |
|       | ✓ Query_10004 | 56  | NA[ 3]MEDVIEDIIGMESSFKEE-----gadSPLLMQRTL--SGSILDVYSGEQGISPINMg1TSASCPSSLPM-KRE  | 125 |
|       | ✓ Query_10005 | --  | -----                                                                            |     |
|       | ✓ Query_10001 | 291 | LT[ 6]ESEARALAKERQKKDNHNLIERRRRFNINDRIKELGTLPKSNPDMRWNGTILKASVDYIRKLQREQQRAKEL   | 373 |
|       | ✓ Query_10002 | 333 | IS ETEAKALLKERQKKDNHNLIERRRRFNINDRIKELGTLPKSSDPemRWNGTILKASVDYIRKLQKEQQRSKDL     | 409 |
|       | ✓ Query_10003 | 222 | LT DAESRALAKERQKKDNHNLIERRRRFNINDRIKELGMLIPKANDLDRWNGTILKASVDYIRRMQKDLQKSREL     | 298 |
|       | ✓ Query_10004 | 126 | IT ETDRALAKERQKKDNHNLIERRRRYINIRIKELGTLPKSNPDMRWNGTILKASVEYIKWLQKEQQRAREL        | 202 |
|       | ✓ Query_10005 | --  | -----                                                                            |     |
| MITF  | ✓ Query_10001 | 374 | ENRQKLEHANRHLLLRIQELEMQARAHGLSLIPSTGLCSPDLVNRIIKQE-PVLENCSDQL LQHHADLTCTTTLD     | 448 |
| TFE3  | ✓ Query_10002 | 410 | ESRQRSLEQANRSLQLRIQELELQAQIHGLPVPTPGLLSL-----ATTASDSL KPEQLDIE----EE             | 469 |
| TFEB  | ✓ Query_10003 | 299 | ENHSRRLEMTNKQLWLRIQELEMQARVHGLPTTSPSGMMAELAQQVVKQElPSEEGPGEAL[ 14]LPPQAPLPLPTQPP | 388 |
| TFEC  | ✓ Query_10004 | 203 | EHRQKLEQANRLLLRIQELEIQARTHGLPTLASLG--TVDLGAHVTKQqSHPEQNSVDYC --QQLTVSQGSPPE      | 274 |
| Sigma | ✓ Query_10005 | 1   | -----HLLLRIQELEMQARAHGLSLIPSTGLCSPDLVNRIIKQE-PVLENCSDQL LQHHADLTCTTTLD           | 63  |
| MITF  | ✓ Query_10001 | 449 | LTDGTITFNNNLGTGTEANQA---YSVPTKMGSK- LEDILMDD TSPV-GVTDPLLSVSPGASKTSSRRSS         | 515 |
| TFE3  | ✓ Query_10002 | 470 | GRPGAATFH--VGGGPAQNAP---HQQPAPPSDA[ 21]LEDILMEE[ 11]ALSPLrAASDPLLSVSPAVSKASSRRSS | 568 |
| TFEB  | ✓ Query_10003 | 389 | SPFHHLDFSHLSLFGGREDEGppgyPEPLAPGHGS[ 9]LDLMLDD SLLPL--ASDPLLSSTMSPEASKASSRRSS    | 467 |
| TFEC  | ✓ Query_10004 | 275 | LCDQAIAPSDPLSYFTDLFSF-----AALKEEQ[ 1]LDGMLDD TISPF--GTDPLLSATSFAVSKASSRRSS       | 338 |
| Sigma | ✓ Query_10005 | 64  | LTDGTITFNNNLGTGTEANQA---YSVPTKMGSK- LEDILMDD TSPV-GVTDPLLSVSPGASKTSSRRSS         | 130 |
| MITF  | ✓ Query_10001 | 516 | MSMEETEHTc                                                                       | 525 |
| TFE3  | ✓ Query_10002 | 569 | FSMEEES---                                                                       | 575 |
| TFEB  | ✓ Query_10003 | 468 | FSMEEGDVL-                                                                       | 476 |
| TFEC  | ✓ Query_10004 | 339 | FSSDDGDEL-                                                                       | 347 |
| Sigma | ✓ Query_10005 | 131 | MSMEETEHT-                                                                       | 139 |

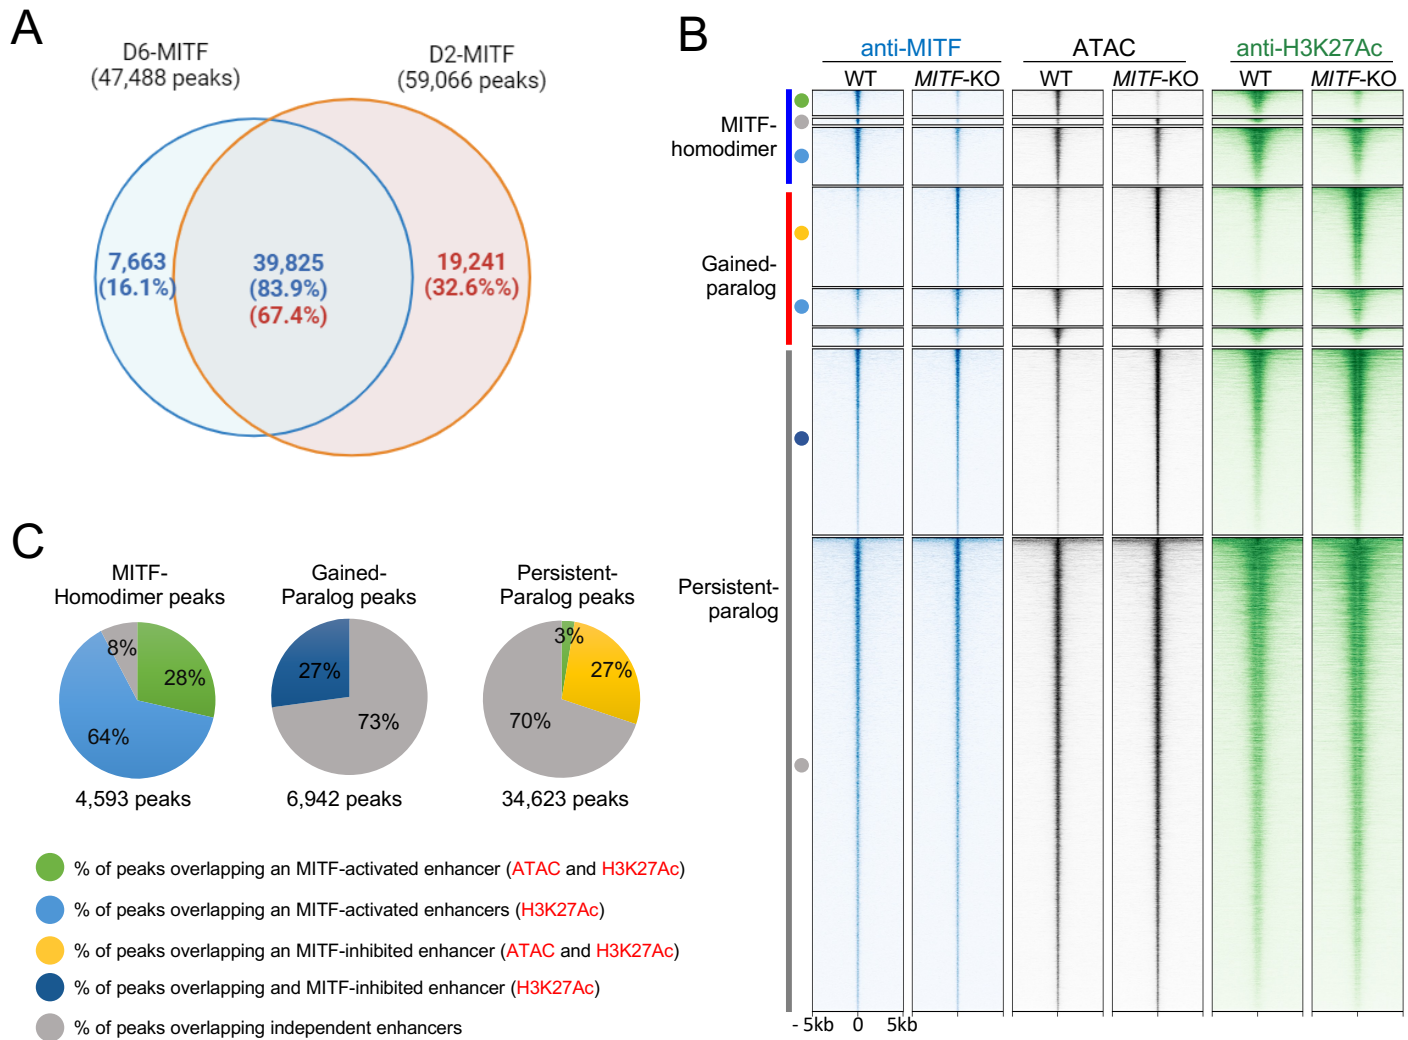

**D**

MITF-Homodimer peaks  
Gene Ontology analysis (Panther)

| GO                                         | No. of genes | FDR                   |
|--------------------------------------------|--------------|-----------------------|
| Developmental processes                    | 1103         | $2.6 \times 10^{-15}$ |
| Cell differentiation                       | 710          | $1.7 \times 10^{-9}$  |
| Developmental pigmentation                 | 21           | $3.7 \times 10^{-5}$  |
| Regulation of cytokine production          | 173          | $8.9 \times 10^{-5}$  |
| Melanocyte differentiation                 | 10           | $2.6 \times 10^{-3}$  |
| Organelle localization                     | 119          | $5.0 \times 10^{-3}$  |
| Pigment cell differentiation               | 14           | $8.4 \times 10^{-3}$  |
| Melanin biosynthetic process from tyrosine | 4            | $1.9 \times 10^{-2}$  |

**E**

Gained-paralog peaks  
Gene Ontology analysis (Panther)

| GO                                                 | No. of genes | FDR                   |
|----------------------------------------------------|--------------|-----------------------|
| Regulation of cell migration                       | 266          | $1.5 \times 10^{-17}$ |
| Extracellular matrix organization                  | 87           | $1.0 \times 10^{-13}$ |
| Regulation of metabolic process                    | 1287         | $2.4 \times 10^{-13}$ |
| Regulation of metabolic process                    | 1287         | $2.4 \times 10^{-13}$ |
| Kidney development                                 | 97           | $8.9 \times 10^{-9}$  |
| Regulation of MAPK cascade                         | 170          | $4.5 \times 10^{-8}$  |
| Regulation of epithelial to mesenchymal transition | 35           | $3.8 \times 10^{-4}$  |
| Wound healing                                      | 78           | $4.0 \times 10^{-3}$  |

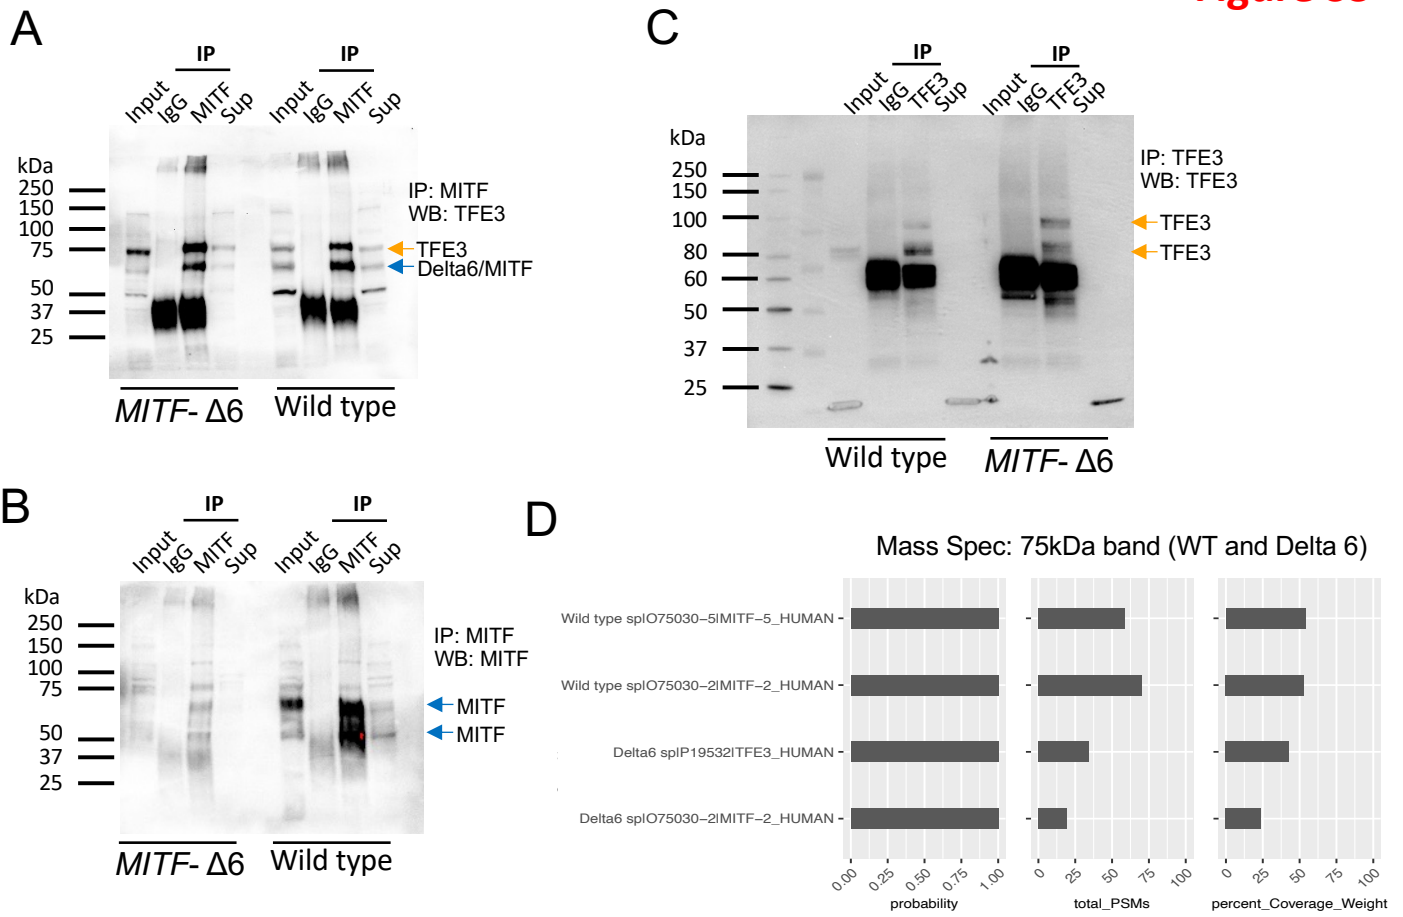

**Figure S4**

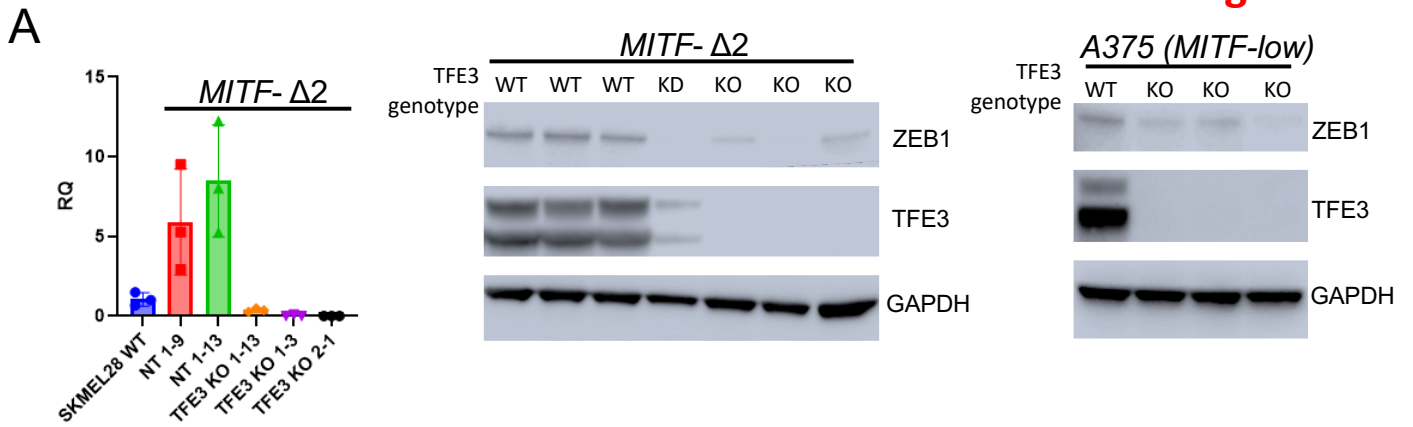

**B** Gene Ontology (GO) analysis: TFE3-dependent

| GO                   | # of genes | FDR                   |
|----------------------|------------|-----------------------|
| Cell differentiation | 129        | $1.5 \times 10^{-07}$ |
| Angiogenesis         | 32         | $9.5 \times 10^{-05}$ |
| Cell motility        | 46         | $1.8 \times 10^{-04}$ |
| Cell migration       | 33         | $2.8 \times 10^{-04}$ |

**C** Gene Ontology (GO) analysis: TFE3-independent

| GO                                                 | # of genes | FDR                   |
|----------------------------------------------------|------------|-----------------------|
| Multicellular organismal process                   | 229        | $8.1 \times 10^{-11}$ |
| Basement membrane assembly                         | 34         | $1.9 \times 10^{-04}$ |
| Regulation of type B pancreatic cell proliferation | 33         | $2.8 \times 10^{-04}$ |
| Lymphocyte mediated immunity                       | 20         | $3.8 \times 10^{-02}$ |

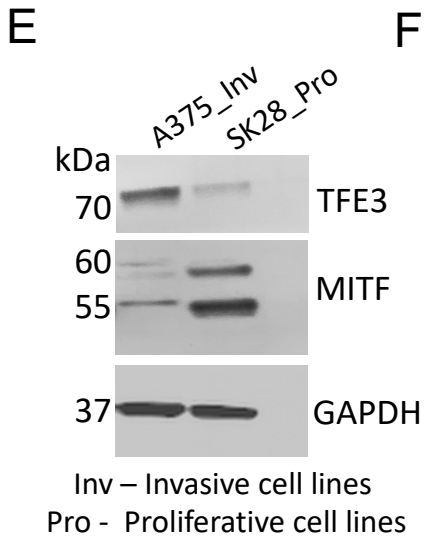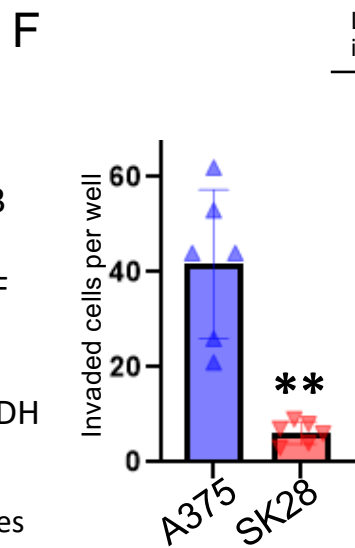

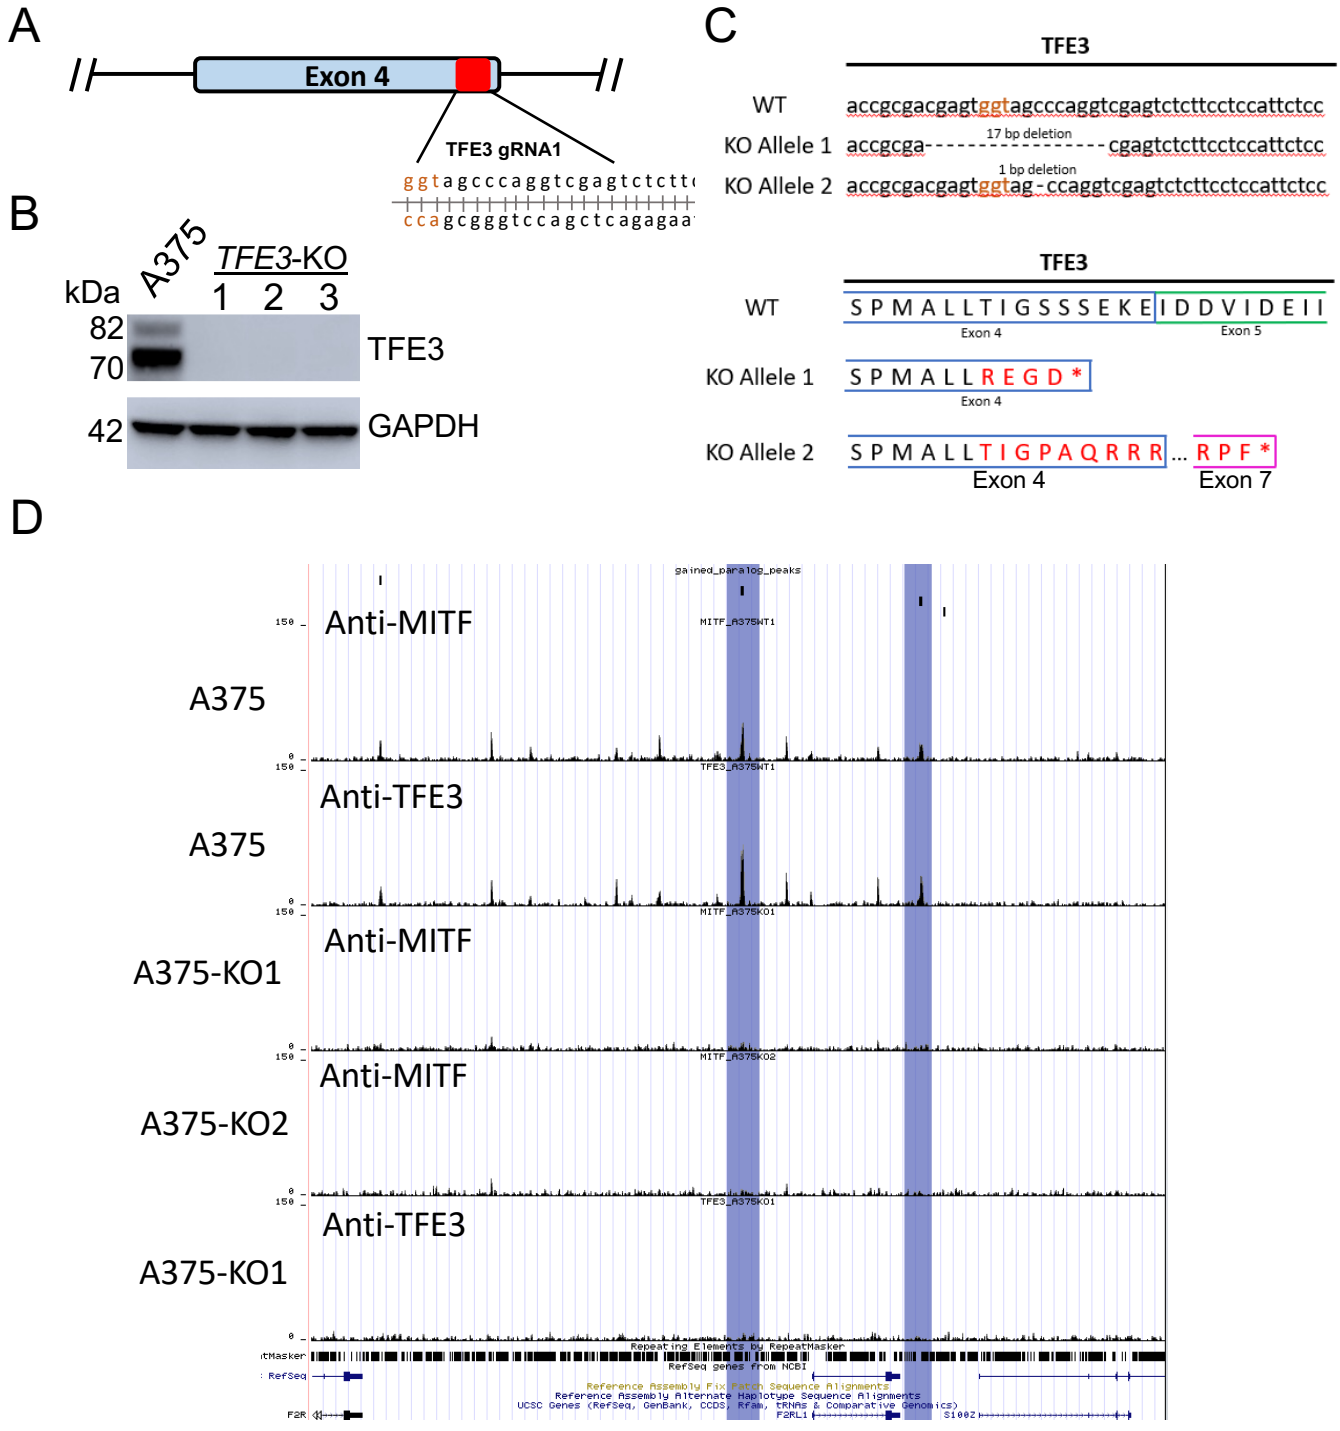

**Figure S6**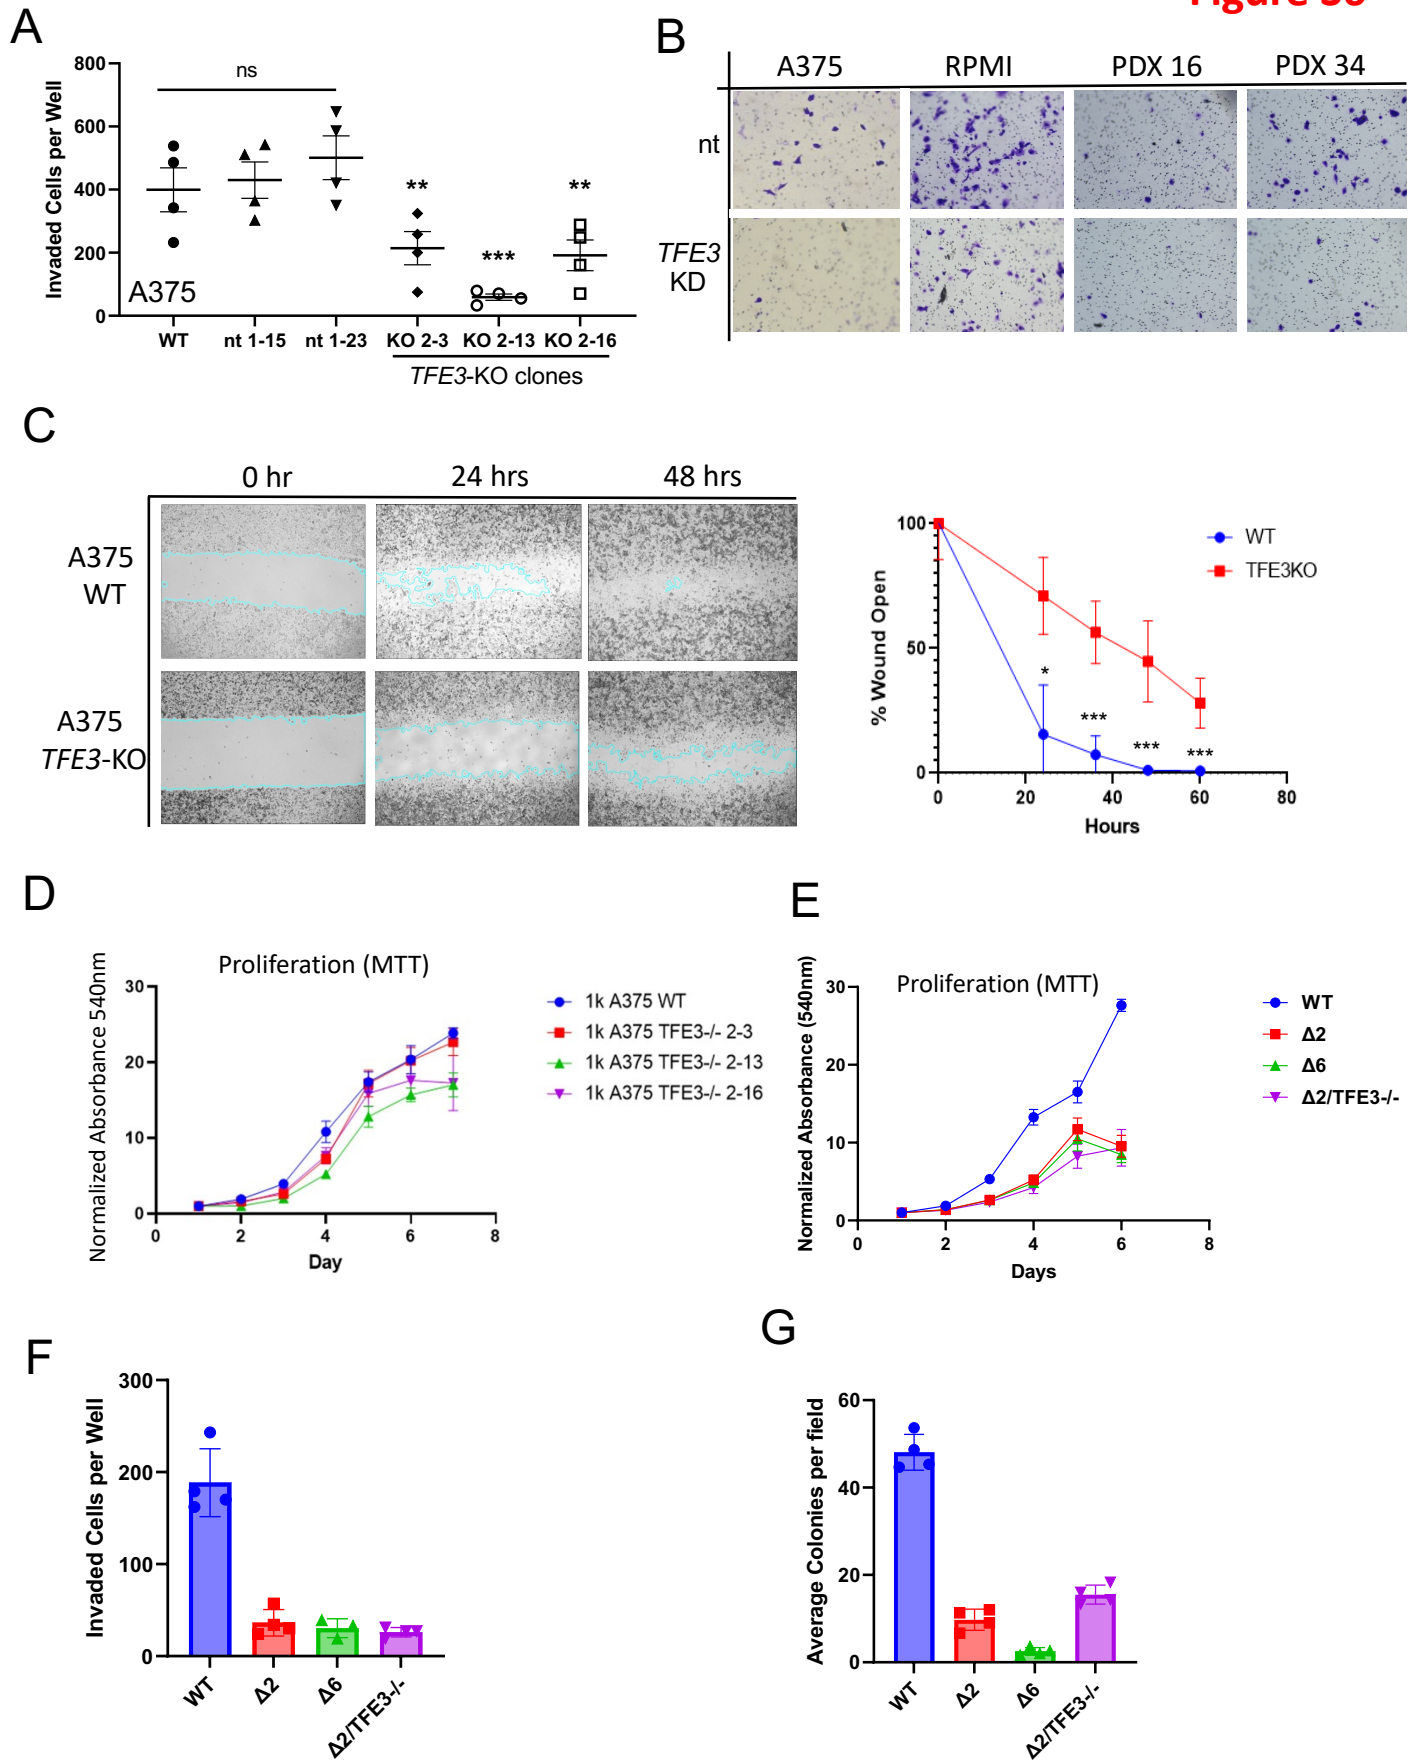



**Figure S7**

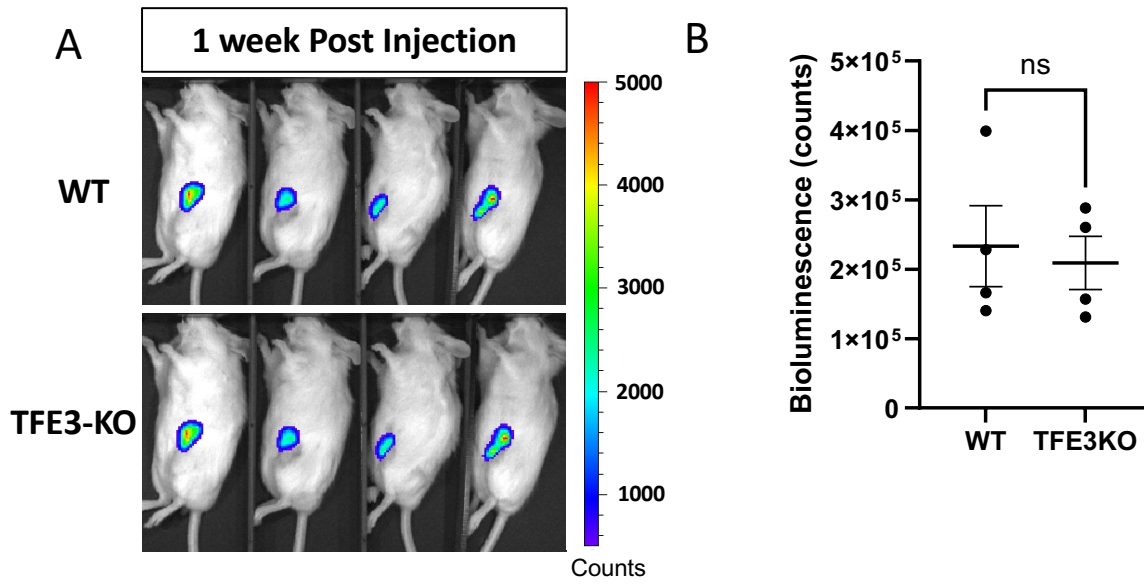

A

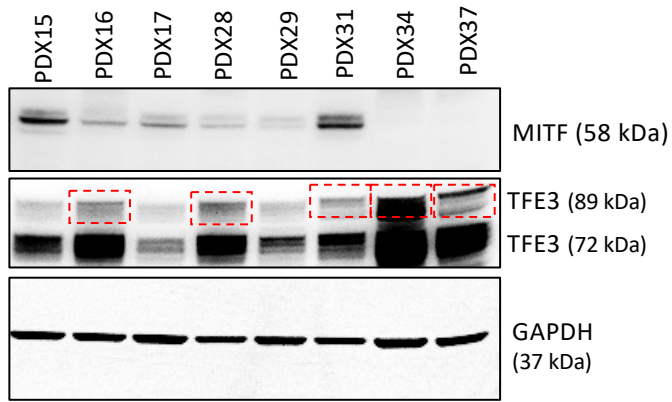

B

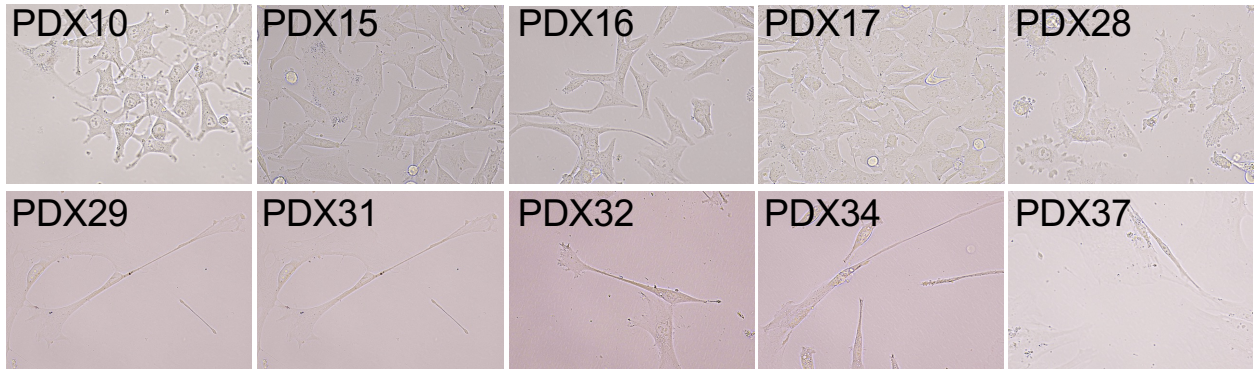

Supplement: media-1.pdf [file media-1.pdf]
